# Supplementary material
Source: HighWire-hosted journal article supplement (https://gut.bmj.com/content/gutjnl-2019-318217)
Supplement: inline-supplementary-material-1 [file inline-supplementary-material-1.xlsx]

## Sheet: Supplementary Table 1
Sample	Gender	Age	Type of Recesction	Treatment Y/ N	Tumor Size	Diagnosis	Composite (%)	Conventional (%)	tubulo-papillary (%)	Squamous (%)	No of slides	Differentiation	Dominant morphology	Morphological	Moffitt	PNI (Y/N)	LVI (Y/N)	Margins (+/-)	# Lymph Nodes	No of LNs positive	TNM
PCSI_0015_Pa_P_526	F	45	Distal	N	16.0cm	ADSQ	0	0	0	100	11	Poor	S	Group B	Basal	Y	N	Neg	17	6	T3N2MX
PCSI_0019_Pa_P_526	M	63	Whipple	N	2.4 cm	ADCA	0	100	0	0	10	Moderate	C	Group A	Classical	Y	N	Neg	15	1	T2N1MX
PCSI_0046_Pa_P_526	M	74	Whipple	N	3.0 cm	ADCA	42	58	0	0	6	Moderate	C	Group B	Classical	Y	Y	Neg	15	5	T2N2MX
PCSI_0047_Pa_P_526	M	54	Whipple	N	3.5 cm	ADCA	57	43	0	0	11	Moderate	M	Group B	Classical	Y	Y	Pos	18	4	T4N2MX
PCSI_0048_Pa_P_526	M	76	Whipple	N	6.5 cm	ADSQ	20	0	0	80	9	Moderate	S	Group B	Basal	N	Y	Neg	20	6	T3N2MX
PCSI_0072_Pa_P_526	M	82	Whipple	N	3.5 cm	ADCA	48	0	52	0	10	Moderately	T	Group B	Basal	Y	Y	Neg	37	10	T2N2MX
PCSI_0073_Pa_P_526	M	54	Whipple	N	3.5cm	ADCA	83	17	0	0	8	Moderate	M	Group B	Classical	Y	Y	Pos	18	6	T4N2Mx
PCSI_0074_Pa_P_526	F	52	Whipple	N	4.0 cm	ADCA	5	95	0	0	8	Moderate	C	Group A	Classical	Y	Y	Neg	20	2	T2N1MX
PCSI_0075_Pa_P_526	M	75	Distal	N	8.0cm	ADCA	5	65	30	0	8	Moderate	C	Group A	Classical	Y	Y	Neg	18	0	T3N0MX
PCSI_0077_Pa_P_526	M	65	Whipple	N	3.0cm	ADCA	0	80	20	0	8	Moderate	C	Group A	Basal	y	Y	Neg	30	7	T2N2MX
PCSI_0080_Pa_P_526	M	70	Whipple	N	3.5 cm	ADCA	10	80	10	0	7	Moderate	C	Group A	Classical	Y	Y	Neg	22	5	T2N2MX
PCSI_0081_Pa_P_526	M	53	Whipple	N	3.5 cm	ADCA	0	100	0	0	12	Moderate	C	Group A	Classical	Y	Y	Neg	32	13	T2N2MX
PCSI_0082_Pa_P_526	F	83	Whipple	N	3.5 cm	ADCA	100	0	0	0	6	Moderate	M	Group B	Basal	Y	Y	Neg	12	0	T2N0MX
PCSI_0084_Pa_P_526	F	70	Whipple	N	3.0 cm	ADCA	0	0	100	0	5	Well	T	Group A	Classical	Y	Y	Pos	23	6	T2N2MX
PCSI_0085_Pa_P_526	F	54	Distal	N	2.4 cm	ADCA	10	90	0	0	7	Moderate	C	Group A	Classical	Y	Y	Pos	14	2	T2N1MX
PCSI_0098_Pa_P_526	M	75	Whipple	N	3.0 cm	ADCA	5	30	65	0	8	Well	T	Group A	Classical	Y	Y	Pos	11	3	T2N1MX
PCSI_0099_Pa_P_526	F	76	Whipple	N	3.0 cm	ADCA	0	100	0	0	9	Moderate	C	Group A	Classical	Y	Y	Neg	16	3	T2N1MX
PCSI_0101_Pa_P_526	M	59	Whipple	N	3.5 cm	ADCA	56	44	0	0	11	Moderate	M	Group B	Classical	Y	Y	Neg	20	3	T2N1MX
PCSI_0102_Pa_P_526	F	50	Distal	N	3.6cm	ADCA	90	5	5	0	5	Poor	M	Group B	Classical	Y	N	Neg	39	0	T2N0MX
PCSI_0103_Pa_P_526	F	68	Whipple	N	2.5 cm	ADCA	25	75	0	0	11	Moderate	C	Group A	Classical	N	Y	Neg	23	9	T2N2MX
PCSI_0104_Pa_P_526	F	61	Distal	N	3.8cm	ADCA	0	0	100	0	5	Well	T	Group A	Classical	Y	N	Neg	14	0	T2N0MX
PCSI_0105_Pa_P_526	F	58	Distal	N	2.2 cm	ADCA	0	70	30	0	4	Well	C	Group A	Classical	Y	Y	Pos	23	1	T2N1MX
PCSI_0106_Pa_P_526	F	77	Distal	N	2.7 cm	ADCA	0	25	75	0	8	Moderate	T	Group A	Classical	Y	Y	Neg	22	0	T2N0MX
PCSI_0107_Pa_P_526	M	60	Whipple	N	3.5 cm	ADCA	0	100	0	0	8	Well	C	Group A	Classical	Y	N	Neg	25	2	T2N1MX
PCSI_0108_Pa_P_526	M	64	Whipple	N	3.6cm	ADCA	0	100	0	0	7	Well	C	Group A	Classical	Y	Y	Pos	30	5	T2N0MX
PCSI_0109_Pa_P_526	M	55	Whipple	N	2.3 cm	ADCA	100	0	0	0	5	Poor	M	Group B	Basal	Y	Y	Neg	42	4	T2N2MX
PCSI_0111_Pa_P_526	M	69	Whipple	N	4.5cm	ADCA	0	100	0	0	5	Well	C	Group A	Classical	Y	N	Neg	19	2	T3N0MX
PCSI_0170_Pa_P_526	F	63	Whipple	N	1.9 cm	ADCA	0	30	70	0	5	Well	T	Group A	Classical	Y	N	Neg	4	0	T1N0MX
PCSI_0173_Pa_P_526	F	57	Whipple	N	3.7cm	ADCA	78	22	0	0	9	Moderate	M	Group B	Classical	Y	N	Neg	19	5	T3N0MX
PCSI_0175_Pa_P_526	F	51	Whipple	N	4.5 cm	ADCA	46	54	0	0	6	Moderate	C	Group B	Classical	Y	Y	Neg	18	5	T3N2MX
PCSI_0208_Pa_P_526	F	74	Whipple	N	3.2 cm	ADCA	0	70	30	0	5	Well	C	Group A	Classical	Y	N	Neg	18	0	T2N0MX
PCSI_0218_Pa_P_526	M	50	Whipple	N	2.5cm	ADCA	5	45	50	0	8	Moderate	T	Group A	Classical	Y	Y	Neg	22	3	T2N1MX
PCSI_0226_Pa_P_526	M	42	Distal	N	5.0cm	ADCA	100	0	0	0	4	Poor	M	Group B	Basal	Y	Y	Neg	25	9	T3N2MX
PCSI_0228_Pa_P_526	F	64	Whipple	N	2.6 cm	ADCA	50	50	0	0	6	Moderate	M	Group B	Basal	Y	Y	Pos	26	4	T2N2MX
PCSI_0292_Pa_P_526	M	63	Distal	N	6.5 cm	ADCA	100	0	0	0	4	Poor	M	Group B	Basal	Y	N	Neg	23	0	T2N0MX
PCSI_0294_Pa_P_526	F	50	Whipple	N	4.6 cm	ADCA	39	61	0	0	14	Moderate	C	Group A	Classical	Y	Y	Neg	18	0	T3N0MX
PCSI_0295_Pa_P_526	M	72	Whipple	N	2.4 cm	ADCA	0	100	0	0	9	Well	C	Group A	Classical	Y	Y	Neg	28	3	T2N1M1
PCSI_0297_Pa_P_526	F	86	Distal	N	3.0 cm	ADCA	44	56	0	0	13	Moderate	C	Group B	Classical	Y	Y	Neg	16	1	T2N1MX
PCSI_0301_Pa_P_526	M	84	Whipple	N	3.0 cm	ADCA	42	58	0	0	9	Moderate	C	Group B	Classical	Y	Y	Neg	29	2	T2N1MX
PCSI_0351_Pa_P_526	M	66	Whipple	N	6.0 cm	ADCA	5	0	95	0	8	Moderate	T	Group A	Classical	Y	Y	Neg	22	4	T3N2MX
PCSI_0352_Pa_P_526	F	74	Whipple	N	4.0 cm	ADCA	19	81	0	0	9	Moderate	C	Group A	Classical	Y	Y	Neg	21	5	T2N2MX
PCSI_0353_Pa_P_526	F	53	Whipple	N	2.5 cm	ADCA	0	0	100	0	15	Moderate	T	Group A	Classical	Y	Y	Neg	22	0	T2N0MX
PCSI_0354_Pa_P_526	F	70	Whipple	N	4.0 cm	ADCA	65	35	0	0	10	Poor	M	Group B	Classical	Y	Y	Neg	28	10	T2N2MX
PCSI_0355_Pa_P_526	F	64	Whipple	N	4.5 cm	ADCA	20	80	0	0	9	Moderate	C	Group A	Classical	Y	Y	Neg	30	4	T3N2MX
PCSI_0356_Pa_P_526	M	62	Whipple	N	3.5cm	ADCA	57	0	43	0	7	Moderate	M	Group B	Classical	Y	Y	Neg	17	2	T2N1MX
PCSI_0357_Pa_P_526	F	62	Whipple	N	2.7 cm	ADCA	0	100	0	0	9	Moderate	C	Group A	Classical	Y	Y	Neg	23	0	T2N0MX
PCSI_0358_Pa_P_526	F	50	Whipple	N	3.4 cm	ADCA	26	74	0	0	11	Moderate	C	Group A	Classical	Y	N	Neg	16	2	T2N1MX
PCSI_0383_Pa_P_526	M	78	Whipple	N	3.0 cm	ADCA	25	75	0	0	0	Moderate	C	Group A	Classical	Y	Y	Pos	15	2	T2N1MX
PCSI_0384_Pa_P_526	M	66	Whipple	N	4.0 cm	ADCA	0	100	0	0	11	Moderate	C	Group A	Classical	Y	Y	Neg	24	2	T2N1MX
PCSI_0392_Pa_P_526	F	66	Distal	N	4.6 cm	ADCA	75	25	0	0	0	Poor	M	Group B	Classical	Y	Y	Neg	17	1	T3N1MX
PCSI_0402_Pa_P_526	M	74	Distal	N	3.4 cm	ADCA	47	53	0	0	8	Moderate	C	Group B	Classical	Y	N	Neg	31	1	T2N1MX
PCSI_0403_Pa_P	M	81	Whipple	N	2.7 cm	ADCA	0	60	40	0	11	Well	C	Group A	Classical	Y	Y	Neg	20	0	T2N0MX
PCSI_0449_Pa_P_526	M	65	Whipple	N	4.4 cm	ADCA	0	0	100	0	9	moderate	T	Group A	Classical	Y	N	Neg	34	0	T3N0MX
PCSI_0451_Pa_P_526	M	73	Whipple	N	6.0 cm	ADCA	0	50	50	0	11	Moderate	C	Group A	Classical	Y	Y	Pos	38	1	T3N1MX
PCSI_0456_Pa_P_526	F	54	Whipple	N	3.5 cm	ADCA	0	100	0	0	8	Moderate	C	Group A	Classical	Y	Y	Neg	21	7	T2N2MX
PCSI_0458_Pa_P_526	M	83	Whipple	N	3.2cm	ADCA	83	17	0	0	9	Moderate	M	Group B	Classical	Y	Y	Neg	18	0	T2N0MX
PCSI_0460_Pa_P_526	F	75	Whipple	N	3.7 cm	ADCA	80	20	0	0	9	Poor	M	Group B	Basal	Y	N	Pos	20	1	T2N1MX
PCSI_0463_Pa_P_526	M	38	Whipple	N	3.8 cm	ADCA	77	23	0	0	12	Moderate	M	Group B	Basal	Y	Y	Neg	20	3	T2N1MX
PCSI_0468_Pa_P_526	M	79	Whipple	N	4.1 cm	ADCA	0	25	75	0	8	Well	T	Group A	Classical	Y	Y	Neg	12	0	T3N0MX
PCSI_0469_Pa_P_526	F	70	Whipple	N	4.0 cm	ADCA	42	58	0	0	11	Moderate	C	Group B	Classical	Y	Y	Neg	37	2	T2N1MX
PCSI_0472_Pa_P_526	M	75	Whipple	N	3.0 cm	ADCA	5	95	0	0	8	Moderate	C	Group A	Classical	Y	Y	Neg	21	0	T2N0MX
PCSI_0473_Pa_P_526	F	59	Whipple	N	2.5 cm	ADCA	0	40	60	0	6	Well	T	Group A	Classical	Y	Y	Neg	12	2	T2N1MX
PCSI_0588_Pa_P_526	M	78	Whipple	N	3.6 cm	ADSQ	0	0	0	100	8	Poor	S	Group B	Basal	Y	Y	Neg	34	1	T2N1MX
PCSI_0589_Pa_P_526	F	52	Whipple	N	3.5 cm	ADCA	0	100	0	0	5	Moderate	C	Group A	Classical	Y	Y	Neg	16	1	T2N1MX
PCSI_0590_Pa_P_526	M	73	Total	N	5.8cm	ADCA	65	35	0	0	7	Poor	M	Group B	Basal	Y	N	Neg	23	4	T3N2MX
PCSI_0592_Pa_P_526	F	63	Whipple	N	3.9cm	ADCA	86	14	0	0	8	Poor	M	Group B	Basal	Y	Y	Neg	13	4	T2N2MX
PCSI_0593_Pa_P_526	M	62	Whipple	N	3.7cm	ADCA	5	70	25	0	5	Moderate	C	Group A	Classical	Y	Y	Neg	21	11	T2N2MX
PCSI_0594_Pa_P_526	M	63	Whipple	N	2.3 cm	ADCA	0	0	100	0	7	Well	T	Group A	Classical	Y	Y	Pos	23	18	T2N2MX
PCSI_0611_Pa_P_526	M	59	Whipple	N	4.0 cm	ADCA	100	0	0	0	13	Poor	M	Group B	Basal	Y	Y	Neg	28	2	T2N1MX
PCSI_0612_Pa_P_526	M	58	Distal	N	3.3 cm	ADCA	0	35	65	0	9	Moderate	T	Group A	Classical	Y	N	Neg	14	2	T2N1MX
PCSI_0613_Pa_P_526	M	48	Whipple	N	3.3 cm	ADCA	25	75	0	0	16	Poor	C	Group A	Classical	Y	Y	Neg	26	13	T2N2MX
PCSI_0616_Pa_P_526	M	73	Whipple	N	3.3cm	ADCA	0	100	0	0	9	Moderate	C	Group A	Classical	Y	Y	Neg	37	2	T2N0MX
PCSI_0624_Pa_P_526	M	70	Whipple	N	3.4 cm	ADCA	39	61	0	0	8	Moderate	C	Group A	Classical	Y	Y	Pos	17	3	T2N1MX
PCSI_0625_Pa_P_526	F	69	Whipple	N	4.1 cm	ADCA	41	59	0	0	11	Moderate	C	Group B	Classical	Y	Y	Neg	39	4	T3N2MX
PCSI_0628_Pa_P_526	F	79	Whipple	N	2.4 cm	ADCA	75	25	0	0	13	Moderate	M	Group B	Basal	Y	Y	Neg	20	4	T2N2MX
PCSI_0629_Pa_P_526	F	74	Whipple	N	3.0 cm	ADCA	0	100	0	0	9	Well	C	Group A	Classical	Y	N	Neg	6	1	T2N1MX
PCSI_0633_Pa_P_526	F	59	Whipple	N	3.0 cm	ADCA	60	40	0	0	9	Poor	M	Group B	Classical	Y	Y	Neg	18	4	T2N2MX
PCSI_0638_Pa_P_526	M	66	Whipple	N	2.5 cm	ADCA	10	90	0	0	9	Moderate	C	Group A	Classical	Y	Y	Neg	28	4	T2N2MX
PCSI_0639_Pa_P_526	F	67	Whipple	N	2.8 cm	ADCA	0	20	80	0	9	Moderate	T	Group A	Classical	Y	Y	Neg	38	1	T2N1MX
PCSI_0642_Pa_P_526	M	58	Whipple	N	4.4 cm	ADCA	15	85	0	0	11	Moderate	C	Group A	Classical	Y	N	Neg	18	7	T3N2MX
PCSI_0643_Pa_P_526	M	47	Whipple	N	3.0 cm	ADCA	41	59	0	0	9	Moderate	C	Group B	Classical	Y	Y	Neg	20	2	T2N1MX
PCSI_0645_Pa_P_526	M	79	Distal	N	10.2cm	ADSQ	0	0	0	100	25	Poor	S	Group B	Basal	Y	Y	Neg	6	1	T3N1MX
PCSI_0649_Pa_P_526	M	78	Whipple	N	2.7 cm	ADCA	45	55	0	0	12	Moderate	C	Group B	Basal	Y	Y	Pos	23	11	T2N2MX
PCSI_0655_Pa_P_526	M	69	Whipple	N	2.1 cm	ADCA	56	0	44	0	14	Moderate	M	Group B	Basal	Y	Y	Neg	29	0	T2N0MX
PCSI_0677_Pa_P_526	F	68	Whipple	N	3.3 cm	ADSQ	41	29	0	30	6	Poor	S	Group B	Basal	Y	N	Neg	30	0	T2N0MX
PCSI_0710_Pa_P_526	F	57	Whipple	N	4.0 cm	ADCA	0	100	0	0	10	Moderate	C	Group A	Classical	Y	Y	Neg	29	6	T2N2MX
